# Supplementary material
Source: PubMed Central journal article supplement (PMC3746907)
Supplement: 1308806110_pnas.201308806SI.pdf [file 1308806110_pnas.201308806SI.pdf]

# Supporting Information

Gao and Cooper 10.1073/pnas.1308806110

## SI Text

The following antibodies were used for Western blot analysis: rabbit anti-PKM1 (Sigma-Aldrich), rabbit anti-PKM2 (Cell Signaling Technology), rabbit anti-PKM1/2 (Cell Signaling Technology), rabbit anti-GAPDH (Cell Signaling Technology), rabbit anti-pyrophosphatase (PTB) (Abcam), mouse anti-

hnRNPA1 (Santa Cruz Biotechnology), mouse anti-hnRNP1/A2 (Abcam), rabbit anti-hnRNPH, mouse anti-CELF1 (Millipore), mouse anti-MBNL1 (LifeSpan BioSciences), mouse anti-SRSF3 (Invitrogen), mouse anti-MBNL2 (Santa Cruz Biotechnology), and the Glycolysis Sampler Antibody Kit (Cell Signaling Technology).

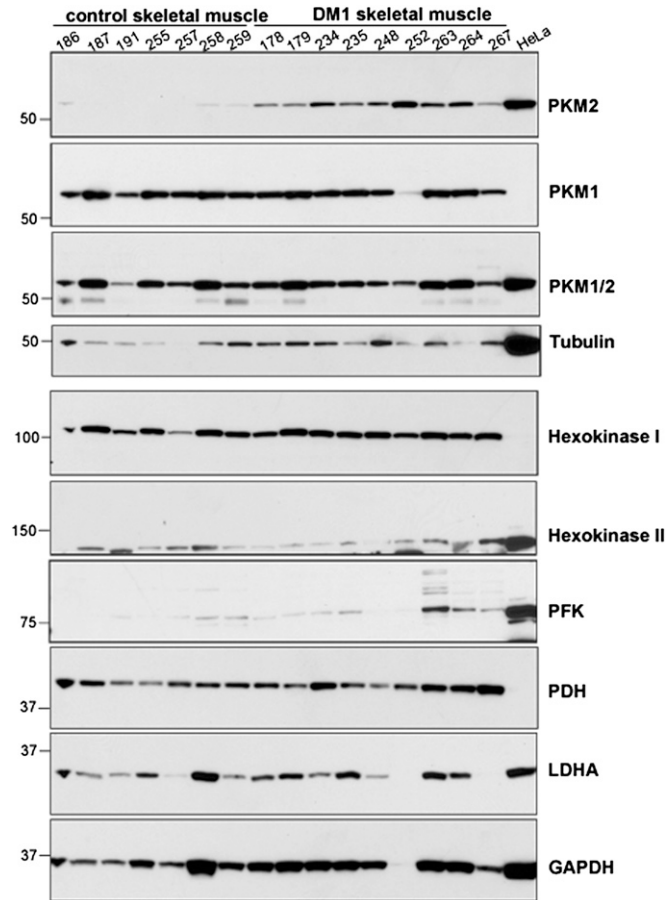

**Fig. S1.** No apparent change in glycolytic enzymes other than PKM2 in myotonic dystrophy type 1 (DM1). Shown are Western blots of enzymes in the glycolysis pathway in control and DM1 skeletal muscle samples using antibodies to hexokinase I, hexokinase II, phosphofructokinase (PFK), lactate dehydrogenase A (LDHA), pyruvate dehydrogenase (PDH), and GAPDH antibodies. The blots for PKM1, PKM2, PKM total, and tubulin are the same as in Fig. 2 and are shown for visual reference.

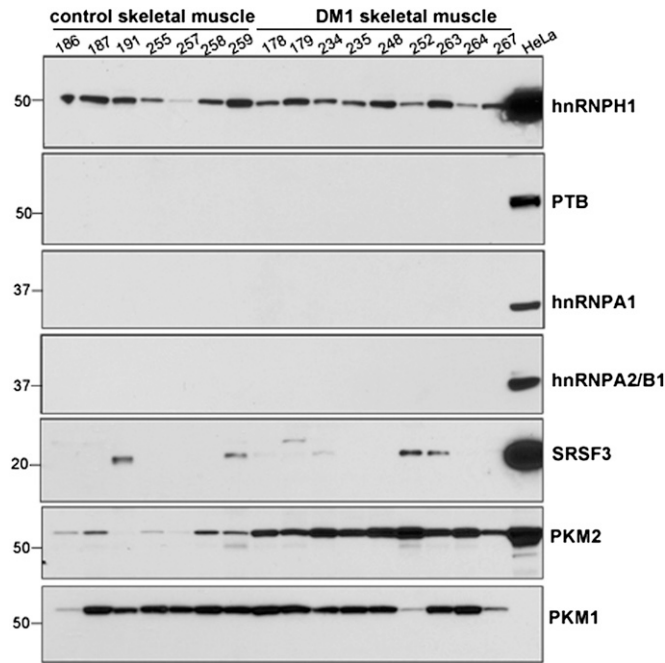

**Fig. S2.** No correlation between expression of known PKM splicing regulators and that of PKM2 in DM1 samples. Shown are Western blots of splicing factors and PKM isoforms in control and DM1 skeletal muscle samples using antibodies to PTB, hnRNPA1, hnRNPA2/B1, SRSF3, hnRNPH1, PKM2, and PKM1, as indicated.

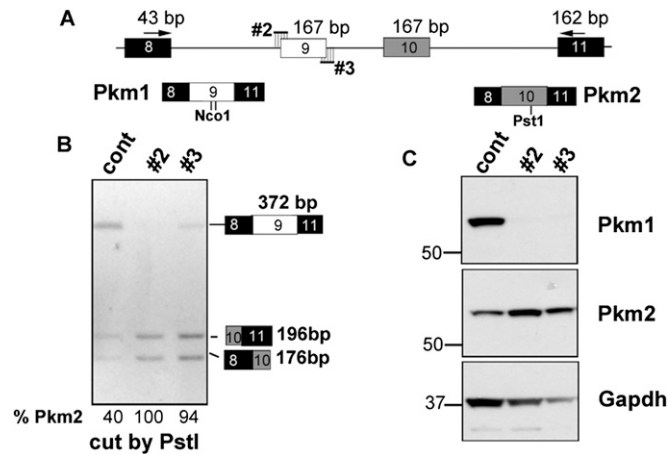

**Fig. S3.** Redirected Pkm splicing by morpholino oligonucleotides (MOs) in C2C12 myotubes. (A) Schematic of the Pkm genomic region containing exons 8–11. Primers used for PCR, two NcoI sites in exon 9 (6 nt apart), and a PstI site in exon 10 are indicated. MOs (#2 and #3) complementary to the 3' and 5' splice sites of exon 9 are shown. (B) RT-PCR analysis of Pkm transcripts in C2C12 myotubes at 6 d after differentiation in the presence of 10  $\mu$ M control, #2 MOs, or #3 MOs. (C) Western blot analysis of proteins from C2C12 myotubes treated with MOs.



**Table S1. Sequences of siRNAs and MOs**

|                  | Sense sequence            | Antisense sequence/comments          |
|------------------|---------------------------|--------------------------------------|
| siRNAs           |                           |                                      |
| MBNL1-A5         | ACGACGUCAUUAGCCAUUUGUAUA  | UAUACAAUAUGGCUAAUGACGUCGU            |
| MBNL1-A7         | CACAGCCAACCAGAUACCCAUAUA  | UAUUAUGGGUAUCUGGUUGGCUGUG            |
| MBNL2-A1         | GAGAUUAAUGGGAGGAACAAUUUGA | UCAAAUUGUUCUCCCAUUAUCUC              |
| MBNL2-A3         | GCGUUGCAUGAGGGAGAAAUGCAA  | UUUGCAUUUCUCCUCAUGCAACGC             |
| MOs              |                           |                                      |
| PKM-#1           | GCTATCTGTAAGGTTTAGGGTAGGA | Complementary to 3' SS of PKM exon 9 |
| PKM-#2           | TCCCGAGCTATCTGTAAGGTTTAGG | Complementary to 3' SS of PKM exon 9 |
| PKM-#3           | ACCTGCCCTTAGGTCCTACCTGCC  | Complementary to 5' SS of PKM exon 9 |
| Inverted control | GGATTTGGAATGTCTATCGGCCT   | Inverted sequence of #2              |

SS, splice site.
